# Supplementary material
Source: PubMed Central journal article supplement (PMC8286271)
Supplement: NIHMS1645681-supplement-1.pdf [file NIHMS1645681-supplement-1.pdf]

**Supplementary Material, Table S1.** Preferences for Everyday Living Inventory (PELI) within each sub-scale domain based on factor analysis. Factor loadings (all positive) are indicated as previously identified in Wilkins JM, Locascio JJ, Gunther JM, et al.: Differences in Assessment of Everyday Preferences Between People With Cognitive Impairment and Their Care Partners: The Role of Neuropsychiatric Symptoms. *Am J Geriatr Psychiatry* 2020.

|     | <b>PELI Items in “Autonomous Choice”</b>                                     | <b>Factor Loading</b> |
|-----|------------------------------------------------------------------------------|-----------------------|
| 1.  | How important is it to you to choose when to get up in the morning?          | 0.691                 |
| 2.  | How important is it to you to choose what time of day to bathe?              | 0.578                 |
| 3.  | How important is it for you to choose your own bedtime?                      | 0.567                 |
| 4.  | How important is it to you to choose what clothes to wear?                   | 0.587                 |
| 5.  | How important is it to you to have privacy?                                  | 0.780                 |
| 6.  | How important is it to you to choose <i>what</i> you eat?                    | 0.625                 |
| 7.  | How important is it to you to choose <i>when</i> to eat?                     | 0.586                 |
| 8.  | How important is it to you to choose <i>where</i> to eat?                    | 0.489                 |
| 9.  | How important is it to you to eat at restaurants?                            | 0.419                 |
| 10. | How important is it to you to spend time by yourself?                        | 0.711                 |
| 11. | How important is it to you to attend entertainment events?                   | 0.426                 |
| 12. | How important is it to you to learn about topics that interest you?          | 0.486                 |
| 13. | How important is it to you to do your favorite hobbies?                      | 0.469                 |
| 14. | How important is it to you to have books, magazines, and newspapers to read? | 0.566                 |

|     | <b>PELI Items in “Social Engagement”</b>                                            | <b>Factor Loading</b> |
|-----|-------------------------------------------------------------------------------------|-----------------------|
| 1.  | How important is it to you to spend time on your appearance?                        | 0.442                 |
| 2.  | How important is it to you to have regular contact with family?                     | 0.618                 |
| 3.  | How important is it to you to have regular contact with friends?                    | 0.568                 |
| 4.  | How important is it to you to spend time one-on-one with someone?                   | 0.589                 |
| 5.  | How important is it to you to do things with groups of people?                      | 0.543                 |
| 6.  | How important is it to you to meet new people?                                      | 0.566                 |
| 7.  | How important is it to you to be around children?                                   | 0.446                 |
| 8.  | How important is it to you to volunteer your time?                                  | 0.470                 |
| 9.  | How important is it to you to participate in religious services or practices?       | 0.422                 |
| 10. | How important is it to you to go outside to get fresh air when the weather is good? | 0.643                 |
| 11. | How important is it to you to take care of the place you live?                      | 0.491                 |
| 12. | How important is it to you to do outdoor tasks?                                     | 0.559                 |
| 13. | How important is it to you to exercise?                                             | 0.637                 |
| 14. | How important is it to you to be involved in cooking?                               | 0.470                 |
| 15. | How important is being active to you?                                               | 0.801                 |

|    | <b>PELI Items in “Personal Growth”</b>                                                        | <b>Factor Loading</b> |
|----|-----------------------------------------------------------------------------------------------|-----------------------|
| 1. | How important is it to you to talk to a mental health professional if you are sad or worried? | 0.434                 |
| 2. | How important is it to you to be a member of a club?                                          | 0.439                 |
| 3. | How important is it to you to reminisce about the past?                                       | 0.436                 |
| 4. | How important is it to you to go shopping?                                                    | 0.402                 |
| 5. | How important is it to you to be around animals such as pets?                                 | 0.538                 |
| 6. | How important is it to you to keep up with the news?                                          | 0.414                 |
| 7. | How important is it to you to watch or listen to TV?                                          | 0.533                 |
| 8. | How important is it to you to watch movies with other people?                                 | 0.741                 |

|     |                                                              |       |
|-----|--------------------------------------------------------------|-------|
| 9.  | How important is it to you to use the computer?              | 0.461 |
| 10. | How important is it to you to travel?                        | 0.603 |
| 11. | How important is it for you to have a good challenge?        | 0.524 |
| 12. | How important is it to you to try new things?                | 0.620 |
| 13. | How important is it to you to stay around the house?         | 0.544 |
| 14. | How important is it to you to learn things in a certain way? | 0.535 |

|    | PELI Items in “Keeping a Routine”                                               | Factor Loading |
|----|---------------------------------------------------------------------------------|----------------|
| 1. | How important is it to you to keep the same routine each day?                   | 0.667          |
| 2. | How important is it to you to take a nap when you wish?                         | 0.737          |
| 3. | How important is it to you to do what helps you feel better when you are upset? | 0.513          |
| 4. | How important is it to you to have snacks available between meals?              | 0.650          |
| 5. | How important is it to you to order take-out food?                              | 0.674          |
| 6. | How important is it to you to touch someone that you care about?                | 0.517          |

**Supplementary Material, Figure S1.** Graphical representation of the mean domain scores for the four domains of the Preferences for Everyday Living Inventory (PELI). Each line represents the scores for an individual participant. The black circles denote each domain mean.

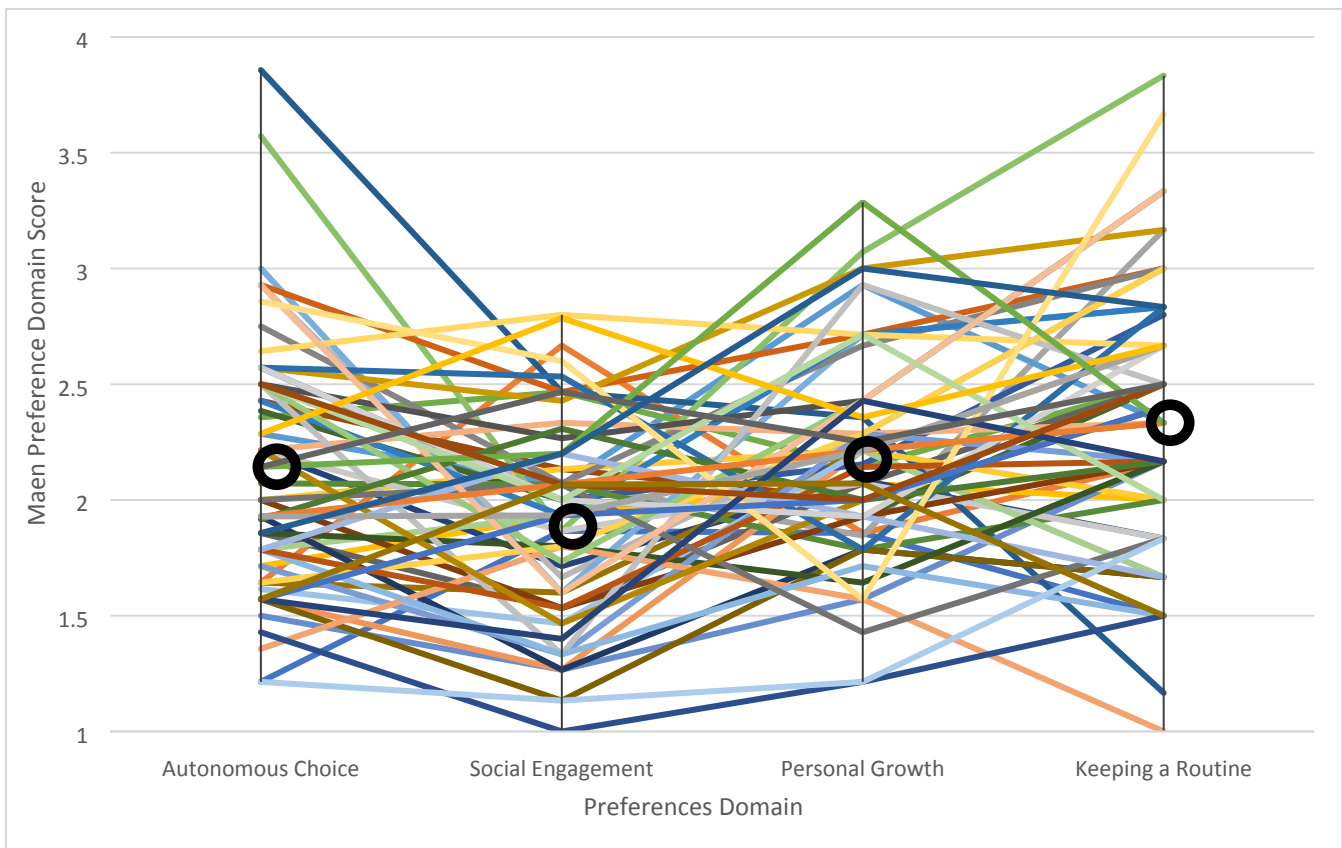

Note: Mean domain score for each domain is calculated as the average of the importance ratings of PELI items contributing to that domain. PELI items are ranked on a 4-point Likert scale with 1 = very important, 2 = somewhat important, 3 = not very important, and 4 = not at all important.
